# Supplementary material
Source: Springer Nature journal article supplement (https://www.springermedizin.de/resource/supplementary/12873_2008_66_MOESM1_ESM.pdf/9431894)
Supplement: MOESM1 [file 9431894]

**Table 1. Acute poisonings treated by the ambulance service**

|               |                        | All ambulance patients |       | Transferred to hospital or outpatient clinic |       | Died on site |       | Discharged from ambulance without transfer |       | p-value (transferred vs. discharged) |
|---------------|------------------------|------------------------|-------|----------------------------------------------|-------|--------------|-------|--------------------------------------------|-------|--------------------------------------|
|               |                        | n                      | %     | n                                            | %     | n            | %     | n                                          | %     |                                      |
| Age (years)   | Median IQR             | 35                     |       | 37                                           |       | 36           |       | 34                                         |       | < 0.001 <sup>†</sup>                 |
|               |                        | 27–46                  |       | 27–48                                        |       | 32–44        |       | 27–42                                      |       |                                      |
| Gender        | Male                   | 1130                   | (61)  | 603                                          | (55)  | 11           | (73)  | 516                                        | (69)  | < 0.001                              |
|               | Female                 | 730                    | (39)  | 492                                          | (45)  | 4            | (27)  | 234                                        | (31)  |                                      |
| Main agent    | Opiates                | 691                    | (37)  | 150                                          | (14)  | 13           | (87)  | 528                                        | (70)  | < 0.001                              |
|               | Ethanol                | 509                    | (27)  | 338                                          | (31)  |              |       | 171                                        | (23)  | < 0.001                              |
|               | Sedatives              | 196                    | (11)  | 183                                          | (17)  |              |       | 13                                         | (2)   | < 0.001                              |
|               | Other illicit drugs    | 86                     | (5)   | 77                                           | (7)   |              |       | 9                                          | (1)   | < 0.001                              |
|               | Antidepressants        | 71                     | (4)   | 68                                           | (6)   |              |       | 3                                          | (0.4) | < 0.001                              |
|               | Paracetamol            | 63                     | (3)   | 58                                           | (5)   |              |       | 5                                          | (1)   | < 0.001                              |
|               | Neuroleptics           | 4                      | (0.2) | 4                                            | (0.4) |              |       | 0                                          | (0)   | 0.1                                  |
|               | Other agents           | 240                    | (13)  | 217                                          | (20)  | 2            | (13)  | 21                                         | (3)   | < 0.001                              |
| Consciousness | Awake                  | 934                    | (50)  | 602                                          | (55)  |              |       | 332                                        | (44)  | < 0.001                              |
|               | Somnolent              | 426                    | (23)  | 273                                          | (25)  |              |       | 153                                        | (20)  | 0.02 <sup>††</sup>                   |
|               | Comatose               | 181                    | (10)  | 103                                          | (9)   |              |       | 78                                         | (10)  | 0.48                                 |
|               | Deeply comatose        | 319                    | (17)  | 117                                          | (11)  | 15           | (100) | 187                                        | (25)  | < 0.001                              |
| Complications | Respiratory depression | 306                    | (17)  | 91                                           | (8)   |              |       | 215                                        | (29)  | < 0.001                              |
|               | Respiratory arrest*    | 74                     | (4)   | 14                                           | (1)   |              |       | 60                                         | (8)   | < 0.001                              |
|               | Cardiac arrest**       | 2                      | (0.1) | 2                                            | (0.2) |              |       | 0                                          | (0)   | NA                                   |
|               | Dead***                | 15                     | (1)   | –                                            | (0)   | 15           | (100) | –                                          | (2)   | NA                                   |
| Antidotes     | Naloxone               | 507                    | (27)  | 140                                          | (13)  | †††          |       | 367                                        | (49)  | < 0.001                              |
| Total         |                        | 1860                   | (100) | 1095                                         | (100) | 15           | (100) | 750                                        | (100) |                                      |

IQR = Inter-quartile range

\*Respiratory arrest without cardiac arrest

\*\*With ROSC = Return of spontaneous circulation

\*\*\*The two patients who survived cardiac arrest during ambulance treatment died later in hospital

<sup>†</sup>Mann–Whitney U-test

<sup>††</sup>Not significant when the whole table is corrected for multiple calculations using the Holm–Bonferroni method

<sup>†††</sup>All patients found in cardiopulmonary arrest, three received prolonged resuscitation, none received antidote

NA = not applicable
